# Supplementary material
Source: Springer Nature journal article supplement (https://www.springermedizin.de/resource/supplementary/13045_2008_19_MOESM1_ESM.pdf/9660482)

**A**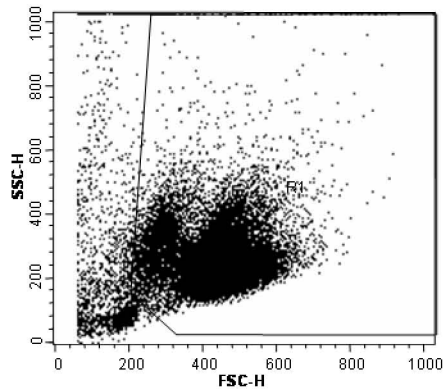**B**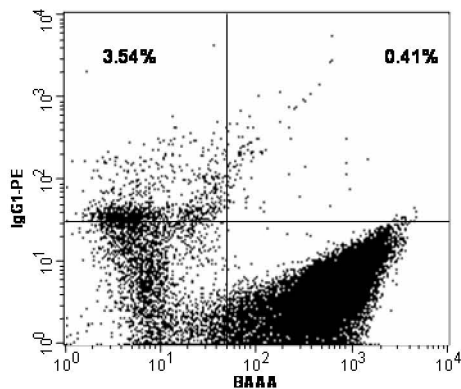**C**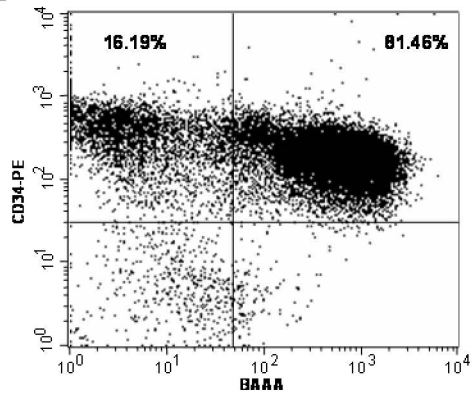

Supplement: MOESM1 [file 9660482]
